# Supplementary material
Source: PubMed Central journal article supplement (PMC3478595)
Supplement: 1208011109_pnas.201208011SI.pdf [file 1208011109_pnas.201208011SI.pdf]

# Supporting Information

Wang et al. 10.1073/pnas.1208011109

## SI Materials and Methods

**Preparations of Monomeric and Oligomeric A $\beta$ 42 Peptides.** The preparation procedure was described previously (1). Synthetic and recombinant wild-type A $\beta$ 42 (AnaSpec) was initially dissolved to 5 mg/mL in hexafluoroisopropanol (Sigma). Hexafluoroisopropanol was removed under vacuum in a Speed Vac, and the peptide film was stored at  $-20^{\circ}\text{C}$ . For monomer preparation, the peptide film was first resuspended in DMSO to a concentration of 12.5 mg/mL and then diluted with DMEM/F-12 (phenol red-free; Invitrogen) to a final concentration of 500  $\mu\text{g}/\text{mL}$ . Oligomer preparation was obtained by incubating the monomer preparation at  $4^{\circ}\text{C}$  for 24 h. Prepared monomers and oligomers were detected by Western blotting.

**Cell Culture, Transfection, and A $\beta$ 42 Treatments.** COS-7 cells were provided by the James Tissue Culture Facility of Cold Spring Harbor Laboratory. Cells were cultured in DMEM containing 10% FBS (Invitrogen) at  $37^{\circ}\text{C}$  with 5%  $\text{CO}_2$ . Human wild-type A $\beta$ 42 sequence was amplified by PCR from human APP cDNA and constructed into pcDNA vector. Human wild-type EGFR plasmid was kindly provided by Sarah Parsons (University of Virginia, Charlottesville, VA). Cells were transfected with Lipofectamine 2000 (Invitrogen). At 48 h after transfection, cells were washed with fresh medium and incubated with 25  $\mu\text{g}/\text{mL}$  of A $\beta$ 42 oligomers for 15 min. Human EGF (Sigma), 0.5  $\mu\text{g}/\text{mL}$ , was used as a positive control. For gefitinib (Ge), erlotinib (Er), and synthetic compounds treatments, COS-7 cells were pretreated with or without drugs for 15 min, then oligomeric A $\beta$ 42 preparation was added to a final concentration in medium and incubated for another 15 min. Cells were washed three times with PBS before being collected for further experiments.

**Western Blotting Analysis.** Cell or tissue lysates were prepared using RIPA buffer containing 0.3% SDS, 50 mM Tris-HCl (pH 7.4), 0.5% Nonidet P-40, 1% sodium deoxycholate, 150 mM NaCl, 5 mM EDTA, one tablet per 50 mL complete protease inhibitor mixture (Roche Diagnostics), and 1 $\times$  phosphatase inhibitor mixture set III

(Calbiochem). Lysates were diluted in SDS sample buffer and separated by 10–20% Tris-Tricine gels (Invitrogen) and transferred to nitrocellulose membranes (Invitrogen). The membranes were blocked with 3% BSA and blotted with primary antibody overnight at  $4^{\circ}\text{C}$  (for testing A $\beta$ , membranes were boiled in PBS for 3 min before blocking). Primary antibodies used in this study were mouse anti-A $\beta$ 42 (6E10; Covance Research Products), rabbit anti-EGFR (Cell Signaling Technology), mouse anti-phospho-EGFR (Cell Signaling Technology), and rabbit anti-Actin (Sigma). After washing in Tris-buffered saline with Tween (TBST) three times, membranes were incubated with secondary antibodies for 1 h at room temperature. After three washes in TBST, membranes were incubated with ECL working solution (GE Healthcare) and developed with films (GE Healthcare). Imaging data were analyzed with ImageJ (National Institutes of Health).

**Immunoprecipitation.** Protein G-agarose (Roche Diagnostics) beads were washed with PBS and RIPA buffer then conjugated with rabbit anti-EGFR for 4 h at  $4^{\circ}\text{C}$ . Beads were washed and then incubated with cell lysates overnight at  $4^{\circ}\text{C}$ . Cell lysates were removed after three washes with RIPA. Beads were boiled at  $100^{\circ}\text{C}$  for 5 min and loaded into 10–20% Tris-Tricine gels following standard Western blotting protocols.

**Thioflavin-S Staining.** Mice brains were fixed by transcardial perfusion using 4% paraformaldehyde in PBS, pH 7.4. Brain sections (30  $\mu\text{m}$ ) were incubated with a solution including Thioflavin-S (2  $\mu\text{g}/\text{mL}$ ) and Hoechst in PBS for 20 min at room temperature. Images were acquired with a NIKON Ti-E microscope using a 10 $\times$  objective. An intensity threshold was set and was kept constant for all of the images analyzed with Image-Pro Plus 5.0 software (Media Cybernetic). Plaques within the cerebral cortex were selected and measured by standardized fluorescence intensity. The plaque area [(total plaques area/cortex area)  $\times$  100%] was analyzed. The results were obtained from four 10-mo-old male animals in each group (three slices per brain).

1. Dahlgren KN, et al. (2002) Oligomeric and fibrillar species of amyloid-beta peptides differentially affect neuronal viability. *J Biol Chem* 277:32046–32053.

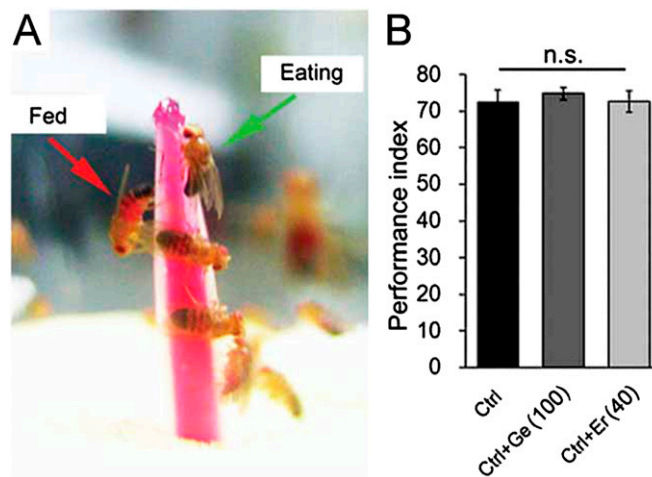

**Fig. S1.** Toxicity of EGFR inhibitors on memory ability of fruit flies. (A) A red food colorant was dissolved in drug solution for indicating the fed flies. Green arrow points to a fly eating the drug; red arrow points to a fly finished eating (red abdomen). (B) No significant memory toxicity of two EGFR inhibitors was found compared with control flies (+*UAS-A $\beta$ 42*+) treated with sucrose. Concentrations (in  $\mu\text{g}/\text{mL}$ ): 100 for gefitinib (Ge) and 40 for erlotinib (Er).  $n = 8$ . Data in this and following figures, unless otherwise indicated, are expressed as means  $\pm$  SEM; n.s., not significant.

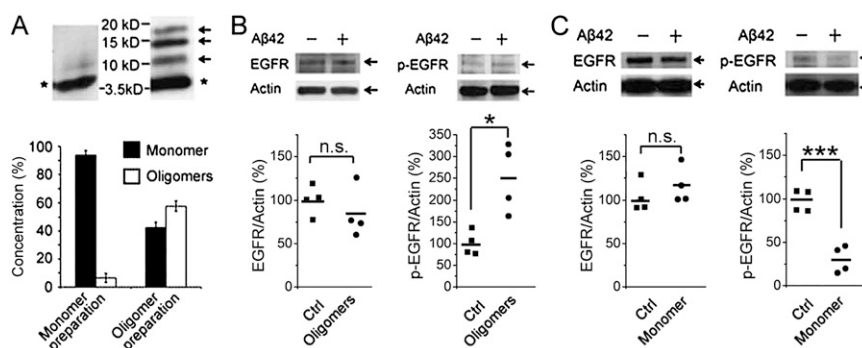

**Fig. S2.** Effects of monomeric and oligomeric A $\beta$ 42 peptides on endogenous EGFR phosphorylation. (A) Prepared A $\beta$ 42 peptides were separated by 10–20% Tricine gels and immunoblotted with 6E10 antibody (Upper). Star shows monomer and arrows indicate oligomers. Statistical results indicate the concentrations of monomers and oligomers in different preparations (Lower). (B and C) COS-7 cells were not transfected with human EGFR<sup>WT</sup> and A $\beta$ 42 plasmids. Endogenous p-EGFR and EGFR levels were detected. Incubation with 25  $\mu\text{g}/\text{mL}$  monomeric or oligomeric A $\beta$ 42 for 15 min induced opposite effects on EGFR activation (Right), whereas total EGFR levels were not influenced (Left).  $n = 3$ –4. For Western blotting results in this and following figures, individual data points and means (horizontal lines) are shown.

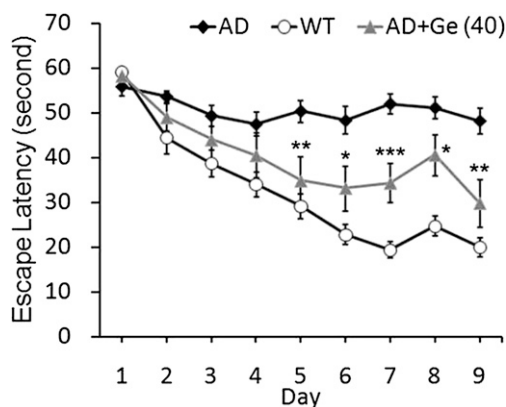

**Fig. S3.** Treatment with Ge rescues the memory loss of APP/PS1 mice. Oral administration of 40  $\text{mg}\cdot\text{kg}^{-1}\cdot\text{d}^{-1}$  Ge for 2 mo (beginning at 6 mo of age) showed a moderate rescue of memory compared with that of APP/PS1 mice treated with vehicle.  $n = 11$ –20.  $t$  test: \* $P < 0.05$ , \*\* $P < 0.01$ , \*\*\* $P < 0.001$ .
